# Supplementary material for: Myositis-Specific and Myositis-Associated Antibodies in Fibromyalgia Patients: A Prospective Study
Source: Biomedicines. 2023 Feb 22;11(3):658. doi: 10.3390/biomedicines11030658 (PMC10045737; doi:10.3390/biomedicines11030658)
Supplement: Supplementary file 1 [file biomedicines-11-00658-s001.zip › biomedicines-2211593-supplementary.pdf]

|                   |                                  |
|-------------------|----------------------------------|
| <b>code</b>       | code                             |
| <b>age</b>        | age                              |
| <b>gender</b>     | gender                           |
| <b>WPI</b>        | Widespread Pain Index            |
| <b>SSS</b>        | Symptoms Severity Score          |
| <b>TP</b>         | Tender Points                    |
| <b>AF</b>         | Atrial Fibrillation              |
| <b>other arr</b>  | other arrhythmias                |
| <b>dyslipide</b>  | dyslipidemia                     |
| <b>hypetensi</b>  | hypertension                     |
| <b>GERD</b>       | Gastro-esophageal reflux disease |
| <b>hypothyri</b>  | hypothyroidism                   |
| <b>depressio</b>  | depression                       |
| <b>T2DM</b>       | Type2 Diabetes Mellitus          |
| <b>MI</b>         | History of Myocardial Infarction |
| <b>stroke</b>     | History of stroke                |
| <b>previous</b>   | previous cancer                  |
| <b>kind</b>       | kind of cancer                   |
| <b>anemia</b>     | anemia                           |
| <b>25OHD</b>      | vitamin D                        |
| <b>ALP</b>        | Alkaline Phosphatase             |
| <b>creatinine</b> | creatinine                       |
| <b>proteinur</b>  | proteinuria spot                 |
| <b>complem</b>    | low fractions of complement      |
| <b>CRP</b>        | C Reactive Protein               |
| <b>ESR</b>        | Erythro sedimentation Rate       |
| <b>TSH</b>        | Thyroid Stimulating Hormone      |
| <b>ft3</b>        | Triiodothyronine free            |
| <b>ft4</b>        | Tetraiodothyronine free          |
| <b>AST</b>        | Aspartate transaminase           |
| <b>ALT</b>        | Alanine Transaminase             |
| <b>LDH</b>        | Lactic Dehydrogenase             |
| <b>CPK</b>        | Creatine Phosphokinase           |
| <b>MSA</b>        | Myositis Specific Antibodies     |
| <b>MAA</b>        | Myositis Associated Antibodies   |
| <b>ANA dic</b>    | ANA dichotomous                  |
| <b>ANA</b>        | Antinuclear Antibodies           |
| <b>speckled</b>   | speckled                         |
| <b>cito</b>       | cytoplasmic pattern              |
| <b>homo</b>       | homogeneous pattern              |
| <b>nucl</b>       | nucleolar pattern                |
| <b>combinec</b>   | combined                         |
| <b>Jo1</b>        | anti-Jo1                         |
| <b>RF</b>         | Rheumatoid factor >2x ULN        |
| <b>SSA60K</b>     | anti-SSA60Kd                     |
| <b>KU</b>         | anti-Ku                          |
| <b>Pm/scl</b>     | anti-Pm/scl                      |
| <b>Tif1gamr</b>   | anti-Tif1gamma                   |
| <b>Mi2</b>        | anti-Mi2                         |
| <b>PL7</b>        | anti-PL7                         |
| <b>MDA5</b>       | anti-MDA5                        |

**SAE** anti-SAE  
**PL12** anti-PL12  
**OJ** anti-OJ  
**histones** anti-histones  
**ACPA** anti citrullinated protein antibody  
**DsDNA** anti-DsDNA  
**RNP** anti-RNP  
**Ro52** anti-Ro52kD  
**SRP** anti-SRP  
**EMG** Electro-myography (positive for myopathy)  
**HRTC** High Resolution Computed Tomography  
**ST** Schirmer Test  
**UWST** Untimulated Whole Saliva Test  
**CTD** Connective Tissue Disease  
**months C** months to from the baseline to the development of CTD  
**Other Dia** Other Diagnoses  
**months to** months to the recognition of other diagnoses  
**Spine MR** Spine Magnetic Resonance Imaging  
**evolution** evolution
